# Supplementary material for: Are cancer-related decision aids appropriate for socially disadvantaged patients? A systematic review of US randomized controlled trials
Source: PubMed Central journal article supplement (PMC4896023; doi:10.1186/s12911-016-0303-6), 2016-06-06
Supplement: 12911_2016_303_MOESM1_ESM.pdf [file 12911_2016_303_MOESM1_ESM.pdf]

---

**Additional File 1. Electronic Search Strategy Used for PubMed**

---

#3 #1 AND #2  
#2 ("2010/01/01"[PDAT] : "2013/12/31"[PDAT])  
("decision aid"[All Fields] OR "patient decision making"[All Fields] OR  
"patient decision-making"[All Fields] OR "shared decision making"[All  
Fields] OR "shared decision-making"[All Fields] OR "informed decision  
#1 making"[All Fields] OR "informed decision-making"[All Fields] OR  
"informed choice"[All Fields]) AND ("randomized controlled"[All Fields]  
OR "RCT"[All Fields] OR "clinical trial"[All Fields] OR "randomized  
trial"[All Fields]) AND ("neoplasms"[MeSH Terms] OR "neoplasms"[All  
Fields] OR "cancer"[All Fields])

---
